# Supplementary material
Source: publisher figshare collection journal article supplement (https://acs.figshare.com/ndownloader/files/4092814)
Supplement: Supplementary file 1 [file 4092814]

## Supporting Information

### A Synergistic Coassembly of Block Copolymer and Fluorescent Probe in Thin Film for Fine-Tuning the Block Copolymer Morphology and Luminescence Property of the Probe Molecules

**Biplab K. Kuila,<sup>\*,†</sup> Chanchal Chakraborty,<sup>‡</sup> and Sudip Malik<sup>\*,‡</sup>**

<sup>†</sup>Centre for Applied Chemistry, Central University of Jharkhand, Brambe, Ranchi 835205, India

<sup>‡</sup>Polymer Science Unit, Indian Association for the Cultivation of Science, 2A&2B Raja S. C. Mullick Road, Kolkata 700 032, India.

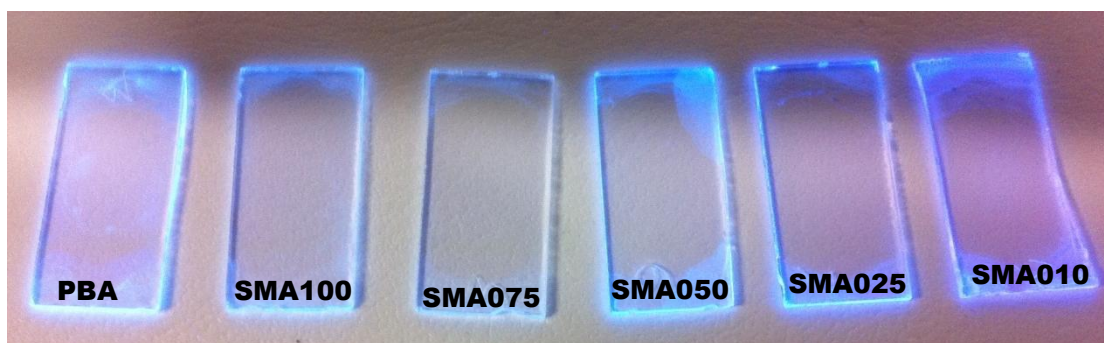

Photograph of the thin films of different supramolecular assemblies on glass substrate under UV light ( $\lambda=365$ ).
